# Supplementary material for: Evaluating the performance and robustness of LLMs in materials science Q&A and property predictions
Source: Royal Society of Chemistry journal article supplement (doi:10.1039/d5dd00090d), 2025-01-01
Supplement: d5dd00090d1.zip [file d5dd00090d1.zip]

EXAMPLE  
IMAGE
