# Supplementary material for: Evaluating the performance and robustness of LLMs in materials science Q&A and property predictions
Source: Royal Society of Chemistry journal article supplement (doi:10.1039/d5dd00090d), 2025-01-01
Supplement: d5dd00090d1.zip [file d5dd00090d1.zip]

# PCCP

Physical Chemistry Chemical Physics

Volume 15, Number 1, 2013

ISSN 1463-9069 (print) / 1463-9077 (online)

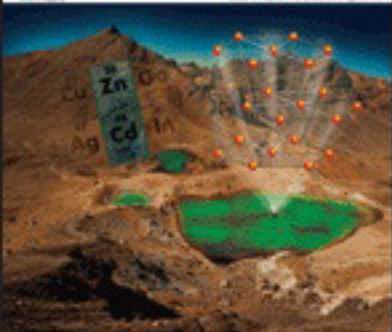

Volume 15, Number 1, 2013

ISSN 1463-9069

(print)

ISSN 1463-9077 (online)

(online)

ISSN 1463-9069

(print)

ISSN 1463-9077 (online)

(online)

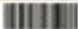

1463-9069(201301)15:1;1-0
